# Supplementary material
Source: PubMed Central journal article supplement (PMC7398462)
Supplement: heartjnl-2020-317062supp001.pdf [file heartjnl-2020-317062supp001.pdf]

**Supplementary File 1.****List of excluded studies by full-text examination and reasons for exclusion.**

No relevant outcome (n=26)

No exposure of interest (n=6)

Overlapping publication (n=5)

Not a primary study (n=16)

Medical intervention study (n=4)

| Study name, year, location                      | Exclusion reason           |
|-------------------------------------------------|----------------------------|
| Zuin, M. (2020) Italy [1]                       | Not a primary study        |
| Zhou, B. (2020) China [2]                       | No relevant outcome        |
| Zheng, F. (2020) China [3]                      | No relevant outcome        |
| Zhao, S. (2020) China [4]                       | Medical intervention study |
| Zhang, L. (2020) China [5]                      | No relevant outcome        |
| Zhang, J. (2020) China [6]                      | No relevant outcome        |
| Yang, C. (2020) China [7]                       | No relevant outcome        |
| Wu, J. (2020) China [8]                         | No relevant outcome        |
| Weiss, P. (2020) USA [9]                        | Not a primary study        |
| Wang, Z. (2020) China [10]                      | No relevant outcome        |
| Wang, D. (2020) China [11]                      | No relevant outcome        |
| Wan, S. (2020) China [12]                       | No relevant outcome        |
| Tian, S. (2020) China [13]                      | No relevant outcome        |
| Tang, X. (2020) China [14]                      | No exposure of interest    |
| Tang, N. (2020) China [15]                      | No exposure of interest    |
| Tang, N. (2020) China [16]                      | Medical intervention study |
| Tam, C. (2020) China [17]                       | No relevant outcome        |
| Sun, P. (2020) China [18]                       | Not a primary study        |
| Sun, P. (2020) China [19]                       | Not a primary study        |
| Rodriguez-Morales, A. (2020) Latin America [20] | Not a primary study        |
| Onder, G. (2020) Italy [21]                     | Not a primary study        |
| Liu, K. (2020) China [22]                       | No relevant outcome        |
| Lippi, G. (2020) Italy [23]                     | Not a primary study        |
| Lippi, G. (2020) Italy [24]                     | Not a primary study        |
| Lippi, G. (2020) Italy [25]                     | Not a primary study        |
| Lippi, G. (2020) Italy [26]                     | Not a primary study        |
| Liang, W. (2020) China [27]                     | Not a primary study        |
| Li, W. (2020) China [28]                        | No exposure of interest    |
| Li, K.(2020) China [29]                         | No relevant outcome        |
| Lei, Z.(2020) China [30]                        | No relevant outcome        |
| Lei, S.(2020) China [31]                        | Medical intervention study |
| Kang, Y.(2020) Korea [32]                       | No relevant outcome        |
| Huang, C.(2020) China [33]                      | No relevant outcome        |
| Han, H.(2020) China [34]                        | No relevant outcome        |
| Guan, W.(2020) China [35]                       | No relevant outcome        |

|                                              |                            |
|----------------------------------------------|----------------------------|
| Gaze, D. (2020) U.K. [36]                    | Not a primary study        |
| Fu, L. (2020) China [37]                     | Not a primary study        |
| Feng, Y. (2020) China [38]                   | No relevant outcome        |
| Du, R. (2020) China [39]                     | No relevant outcome        |
| Dong, N. (2020) China [40]                   | No relevant outcome        |
| Conticini, E. (2020) Italy [41]              | No exposure of interest    |
| Chen, N. (2020) China [42]                   | No exposure of interest    |
| Chen, C. (2020) China [43]                   | No relevant outcome        |
| Cai, Q. (2020) China[44]                     | No relevant outcome        |
| Bonow, R. (2020) U.S.A. [45]                 | Not a primary study        |
| Al-Rousan, N. (2020) Korea[46]               | No exposure of interest    |
| Linschoten, M. (2020) Neitherland [47]       | No relevant outcome        |
| CDC COVID-9 Response Team. (2020) U.S.A.[48] | No relevant outcome        |
| Leung,C. (2020) Australia [49]               | No relevant outcome        |
| Grein, J. (2020) U.S.A. [50]                 | Medical intervention study |
| Dey, S. (2020) Bangladesh [51]               | Not a primary study        |
| Manish, B. (2020) India [52]                 | Not a primary study        |
| Wu, C. (2020) China [53]                     | Overlapping publication    |
| Wang, L. (2020) China [54]                   | Overlapping publication    |
| Ruan, Q. (2020) China [55]                   | Overlapping publication    |
| Du, R. (2020) China [56]                     | Overlapping publication    |
| Chen, T. (2020) China [57]                   | Overlapping publication    |

## References

1. Zuin, M., G. Rigatelli, G. Zuliani, A. Rigatelli, A. Mazza, and L. Roncon, *Arterial hypertension and risk of death in patients with COVID-19 infection: systematic review and meta-analysis*. *J Infect*, 2020.
2. Zhou, B., J. She, Y. Wang, and X. Ma, *The Clinical Characteristics of Myocardial injury 1 in Severe and Very Severe Patients with 2019 Novel Coronavirus Disease*. *The Journal of infection*, 2020.
3. Zheng, F., W. Tang, H. Li, Y.X. Huang, Y.L. Xie, and Z.G. Zhou, *Clinical characteristics of 161 cases of corona virus disease 2019 (COVID-19) in Changsha*. *European review for medical and pharmacological sciences*, 2020. **24**(6): p. 3404-3410.
4. Zhao, S., K. Ling, H. Yan, L. Zhong, X. Peng, S. Yao, J. Huang, and X. Chen, *Anesthetic Management of Patients with COVID 19 Infections during Emergency Procedures*. *Journal of cardiothoracic and vascular anesthesia*, 2020. **34**(5): p. 1125-1131.
5. Zhang, L., F. Zhu, L. Xie, C. Wang, J. Wang, R. Chen, P. Jia, H.Q. Guan, L. Peng, Y. Chen, P. Peng, P. Zhang, Q. Chu, Q. Shen, Y. Wang, S.Y. Xu, J.P. Zhao, and M. Zhou, *Clinical characteristics of COVID-19-infected cancer patients: A retrospective case study in three hospitals within Wuhan, China*. *Annals of oncology : official journal of the European Society for Medical Oncology*, 2020.
6. Zhang, J.-J., X. Dong, Y.-Y. Cao, Y.-D. Yuan, Y.-B. Yang, Y.-Q. Yan, C.A. Akdis, and Y.-D. Gao, *Clinical characteristics of 140 patients infected with SARS-CoV-2 in Wuhan, China*. *Allergy*, 2020.
7. Yang, C. and Z. Jin, *An Acute Respiratory Infection Runs Into the Most Common Noncommunicable Epidemic—COVID-19 and Cardiovascular Diseases*. *JAMA cardiology*, 2020.
8. Wu, J., W. Li, X. Shi, Z. Chen, B. Jiang, J. Liu, D. Wang, C. Liu, Y. Meng, L. Cui, J. Yu, H. Cao, and L. Li, *Early antiviral treatment contributes to alleviate the severity and improve the prognosis of patients with novel coronavirus disease (COVID-19)*. *Journal of internal medicine*, 2020.
9. Weiss, P. and D.R. Murdoch, *Clinical course and mortality risk of severe COVID-19*. *Lancet (London, England)*, 2020. **395**(10229): p. 1014-1015.
10. Wang, Z., B. Yang, Q. Li, L. Wen, and R. Zhang, *Clinical Features of 69 Cases with Coronavirus Disease 2019 in Wuhan, China*. *Clinical infectious diseases : an official publication of the Infectious Diseases Society of America*, 2020.
11. Wang, D., B. Hu, C. Hu, F. Zhu, X. Liu, J. Zhang, B. Wang, H. Xiang, Z. Cheng, Y. Xiong, Y. Zhao, Y. Li, X. Wang, and Z. Peng, *Clinical Characteristics of 138 Hospitalized Patients With 2019 Novel Coronavirus-Infected Pneumonia in Wuhan, China*. *Jama-Journal of the American Medical Association*, 2020. **323**(11): p. 1061-1069.
12. Wan, S., Y. Xiang, W. Fang, Y. Zheng, B. Li, Y. Hu, C. Lang, D. Huang, Q. Sun, Y. Xiong, X. Huang, J. Lv, Y. Luo, L. Shen, H. Yang, G. Huang, and R. Yang, *Clinical features and treatment of COVID-19 patients in northeast Chongqing*. *Journal of Medical Virology*, 2020.
13. Tian, S., N. Hu, J. Lou, K. Chen, X. Kang, Z. Xiang, H. Chen, D. Wang, N. Liu, D. Liu, G. Chen, Y. Zhang, D. Li, J. Li, H. Lian, S. Niu, L. Zhang, and J. Zhang, *Characteristics of COVID-19 infection in Beijing*. *Journal of Infection*, 2020. **80**(4): p. 401-406.
14. Tang, X., R. Du, R. Wang, T. Cao, L. Guan, C. Yang, Q. Zhu, M. Hu, X. Li, Y. Li, L. Liang, Z. Tong, B. Sun, P. Peng, and H. Shi, *Comparison of Hospitalized Patients with Acute Respiratory Distress Syndrome Caused by COVID-19 and H1N1*. *Chest*, 2020.

15. Tang, N., D. Li, X. Wang, and Z. Sun, *Abnormal coagulation parameters are associated with poor prognosis in patients with novel coronavirus pneumonia*. *Journal of Thrombosis and Haemostasis*, 2020. **18**(4): p. 844-847.
16. Tang, N., H. Bai, X. Chen, J. Gong, D. Li, and Z. Sun, *Anticoagulant treatment is associated with decreased mortality in severe coronavirus disease 2019 patients with coagulopathy*. *Journal of thrombosis and haemostasis : JTH*, 2020.
17. Tam, C.C.F., K.S. Cheung, S. Lam, A. Wong, A. Yung, M. Sze, Y.M. Lam, C. Chan, T.C. Tsang, M. Tsui, H.F. Tse, and C.W. Siu, *Impact of Coronavirus Disease 2019 (COVID-19) Outbreak on ST-Segment-Elevation Myocardial Infarction Care in Hong Kong, China*. *Circulation. Cardiovascular quality and outcomes*, 2020: p. CIRCOUTCOMES120006631.
18. Sun, P., S. Qie, Z. Liu, J. Ren, K. Li, and J. Xi, *Clinical characteristics of hospitalized patients with SARS-CoV-2 infection: A single arm meta-analysis*. *Journal of medical virology*, 2020.
19. Sun, P., S. Qie, Z. Liu, J. Ren, K. Li, and J. Xi, *Clinical characteristics of 50 466 hospitalized patients with 2019-nCoV infection*. *Journal of Medical Virology*, 2020.
20. Rodríguez-Morales, A.J., J.A. Cardona-Ospina, E. Gutiérrez-Ocampo, R. Villamizar-Pena, Y. Holguin-Rivera, J.P. Escalera-Antezana, L.E. Alvarado-Arnez, D.K. Bonilla-Aldana, C. Franco-Paredes, A.F. Henao-Martinez, A. Paniz-Mondolfi, G.J. Lagos-Grisales, E. Ramirez-Vallejo, J.A. Suarez, L.I. Zambrano, W.E. Villamil-Gomez, G.J. Balbin-Ramon, A.A. Rabaan, H. Harapan, K. Dhama, H. Nishiura, H. Kataoka, T. Ahmad, and R. Sah, *Clinical, laboratory and imaging features of COVID-19: A systematic review and meta-analysis*. *Travel medicine and infectious disease*, 2020: p. 101623-101623.
21. Onder, G., G. Rezza, and S. Brusaferro, *Case-Fatality Rate and Characteristics of Patients Dying in Relation to COVID-19 in Italy*. *Jama*, 2020.
22. Liu, K., Y.-Y. Fang, Y. Deng, W. Liu, M.-F. Wang, J.-P. Ma, W. Xiao, Y.-N. Wang, M.-H. Zhong, C.-H. Li, G.-C. Li, and H.-G. Liu, *Clinical characteristics of novel coronavirus cases in tertiary hospitals in Hubei Province*. *Chinese medical journal*, 2020.
23. Lippi, G., J. Wong, and B.M. Henry, *Hypertension and its severity or mortality in Coronavirus Disease 2019 (COVID-19): a pooled analysis*. *Polish archives of internal medicine*, 2020.
24. Lippi, G., C.J. Lavie, and F. Sanchis-Gomar, *Cardiac troponin I in patients with coronavirus disease 2019 (COVID-19): Evidence from a meta-analysis*. *Progress in cardiovascular diseases*, 2020.
25. Lippi, G., B.M. Henry, and F. Sanchis-Gomar, *Physical inactivity and cardiovascular disease at the time of coronavirus disease 2019 (COVID-19)*. *European journal of preventive cardiology*, 2020: p. 2047487320916823-2047487320916823.
26. Lippi, G., M.H.S. de Oliveira, and B.M. Henry, *Chronic liver disease is not associated with severity or mortality in Coronavirus disease 2019 (COVID-19): a pooled analysis*. *Eur J Gastroenterol Hepatol*, 2020.
27. Liang, W.-H., W.-J. Guan, C.-C. Li, Y.-M. Li, H.-R. Liang, Y. Zhao, X.-Q. Liu, L. Sang, R.-C. Chen, C.-L. Tang, T. Wang, W. Wang, Q.-H. He, Z.-S. Chen, S.-S. Wong, M. Zanin, J. Liu, X. Xu, J. Huang, J.-F. Li, L.-M. Ou, B. Cheng, S. Xiong, Z.-H. Xie, Z.-Y. Ni, Y. Hu, L. Liu, H. Shan, C.-L. Lei, Y.-X. Peng, L. Wei, Y. Liu, Y.-H. Hu, P. Peng, J.-M. Wang, J.-Y. Liu, Z. Chen, G. Li, Z.-J. Zheng, S.-Q. Qiu, J. Luo, C.-J. Ye, S.-Y. Zhu, L.-L. Cheng, F. Ye, S.-Y. Li, J.-P. Zheng, N.-F. Zhang, N.-S. Zhong, and J.-X. He, *Clinical characteristics and outcomes of hospitalised patients with COVID-19 treated in Hubei (epicenter) and outside Hubei (non-epicenter): A Nationwide Analysis of China*. *The European*

- respiratory journal, 2020.
28. Li, W., J. Zhang, S. Xiao, and L. Sun, *Characteristics of health worker fatality in China during the outbreak of COVID-19 infection*. The Journal of infection, 2020.
  29. Li, K., J. Wu, F. Wu, D. Guo, L. Chen, Z. Fang, and C. Li, *The Clinical and Chest CT Features Associated with Severe and Critical COVID-19 Pneumonia*. Investigative radiology, 2020.
  30. Lei, Z., H. Cao, Y. Jie, Z. Huang, X. Guo, J. Chen, L. Peng, H. Cao, X. Dai, J. Liu, X. Li, J. Zhu, W. Xu, D. Chen, Z. Gao, J. He, and B. Lin, *A cross-sectional comparison of epidemiological and clinical features of patients with coronavirus disease (COVID-19) in Wuhan and outside Wuhan, China*. Travel medicine and infectious disease, 2020: p. 101664-101664.
  31. Lei, S., F. Jiang, W. Su, C. Chen, J. Chen, W. Mei, L.Y. Zhan, Y. Jia, L. Zhang, D. Liu, Z.Y. Xia, and Z. Xia, *Clinical characteristics and outcomes of patients undergoing surgeries during the incubation period of COVID-19 infection*. EClinicalMedicine, 2020.
  32. Kang, Y.-J., *Mortality Rate of Infection With COVID-19 in Korea From the Perspective of Underlying Disease*. Disaster medicine and public health preparedness, 2020: p. 1-3.
  33. Huang, C., Y. Wang, X. Li, L. Ren, J. Zhao, Y. Hu, L. Zhang, G. Fan, J. Xu, X. Gu, Z. Cheng, T. Yu, J. Xia, Y. Wei, W. Wu, X. Xie, W. Yin, H. Li, M. Liu, Y. Xiao, H. Gao, L. Guo, J. Xie, G. Wang, R. Jiang, Z. Gao, Q. Jin, J. Wang, and B. Cao, *Clinical features of patients infected with 2019 novel coronavirus in Wuhan, China*. Lancet, 2020. **395**(10223): p. 497-506.
  34. Han, H., L. Xie, R. Liu, J. Yang, F. Liu, K. Wu, L. Chen, W. Hou, Y. Feng, and C. Zhu, *Analysis of heart injury laboratory parameters in 273 COVID-19 patients in one hospital in Wuhan, China*. Journal of medical virology, 2020.
  35. Guan, W.-J., Z.-Y. Ni, Y. Hu, W.-H. Liang, C.-Q. Ou, J.-X. He, L. Liu, H. Shan, C.-L. Lei, D.S.C. Hui, B. Du, L.-J. Li, G. Zeng, K.-Y. Yuen, R.-C. Chen, C.-L. Tang, T. Wang, P.-Y. Chen, J. Xiang, S.-Y. Li, J.-L. Wang, Z.-J. Liang, Y.-X. Peng, L. Wei, Y. Liu, Y.-H. Hu, P. Peng, J.-M. Wang, J.-Y. Liu, Z. Chen, G. Li, Z.-J. Zheng, S.-Q. Qiu, J. Luo, C.-J. Ye, S.-Y. Zhu, and N.-S. Zhong, *Clinical Characteristics of Coronavirus Disease 2019 in China*. The New England journal of medicine, 2020.
  36. Gaze, D.C., *ANNALS EXPRESS: On the Clinical Utility of Cardiac Troponin measurement in COVID-19 Infection*. Annals of clinical biochemistry, 2020: p. 4563220921888-4563220921888.
  37. Fu, L., B. Wang, T. Yuan, X. Chen, Y. Ao, T. Fitzpatrick, P. Li, Y. Zhou, Y. Lin, Q. Duan, G. Luo, S. Fan, Y. Lu, A. Feng, Y. Zhan, B. Liang, W. Cai, L. Zhang, X. Du, Y. Shu, L. Li, and H. Zou, *Clinical characteristics of coronavirus disease 2019 (COVID-19) in China: a systematic review and meta-analysis*. J Infect, 2020.
  38. Feng, Y., Y. Ling, T. Bai, Y. Xie, J. Huang, J. Li, W. Xiong, D. Yang, R. Chen, F. Lu, Y. Lu, and X. Liu, *COVID-19 with Different Severity: A Multi-center Study of Clinical Features*. 2020.
  39. Du, R.-H., L.-M. Liu, W. Yin, W. Wang, L.-L. Guan, M.-L. Yuan, Y.-L. Li, Y. Hu, X.-Y. Li, B. Sun, P. Peng, and H.-Z. Shi, *Hospitalization and Critical Care of 109 Decedents with COVID-19 Pneumonia in Wuhan, China*. Annals of the American Thoracic Society, 2020.
  40. Dong, N., J. Cai, Y. Zhou, J. Liu, and F. Li, *End-stage Heart Failure with COVID-19: Strong Evidence of Myocardial Injury by 2019-nCoV*. JACC. Heart failure, 2020.
  41. Conticini, E., B. Frediani, and D. Caro, *Can atmospheric pollution be considered a co-factor in extremely high level of SARS-CoV-2 lethality in Northern Italy?* Environmental pollution (Barking, Essex : 1987), 2020: p. 114465-114465.
  42. Chen, N., M. Zhou, X. Dong, J. Qu, F. Gong, Y. Han, Y. Qiu, J. Wang, Y. Liu, Y. Wei, J.a. Xia, T. Yu,

- X. Zhang, and L. Zhang, *Epidemiological and clinical characteristics of 99 cases of 2019 novel coronavirus pneumonia in Wuhan, China: a descriptive study*. *Lancet*, 2020. **395**(10223): p. 507-513.
43. Chen, C., C. Chen, J.T. Yan, N. Zhou, J.P. Zhao, and D.W. Wang, *[Analysis of myocardial injury in patients with COVID-19 and association between concomitant cardiovascular diseases and severity of COVID-19]*. *Zhonghua xin xue guan bing za zhi*, 2020. **48**(0): p. E008-E008.
  44. Cai, Q., D. Huang, P. Ou, H. Yu, Z. Zhu, Z. Xia, Y. Su, Z. Ma, Y. Zhang, Z. Li, Q. He, L. Liu, Y. Fu, and J. Chen, *COVID-19 in a Designated Infectious Diseases Hospital Outside Hubei Province, China*. *Allergy*, 2020.
  45. Bonow, R.O., G.C. Fonarow, P.T. O'Gara, and C.W. Yancy, *Association of Coronavirus Disease 2019 (COVID-19) With Myocardial Injury and Mortality*. *JAMA cardiology*, 2020.
  46. Al-Rousan, N. and H. Al-Najjar, *Data Analysis of Coronavirus CoVID-19 Epidemic in South Korea Based on Recovered and Death Cases*. *Journal of medical virology*, 2020.
  47. Linschoten And, M. and F.W. Asselbergs, *CAPACITY-COVID: a European registry to determine the role of cardiovascular disease in the COVID-19 pandemic*. *European heart journal*, 2020.
  48. *Preliminary Estimates of the Prevalence of Selected Underlying Health Conditions Among Patients with Coronavirus Disease 2019 - United States, February 12-March 28, 2020*. *MMWR. Morbidity and mortality weekly report*, 2020. **69**(13): p. 382-386.
  49. Leung, C., *Clinical features of deaths in the novel coronavirus epidemic in China*. *Reviews in medical virology*, 2020: p. e2103-e2103.
  50. Grein, J., N. Ohmagari, D. Shin, G. Diaz, E. Asperges, A. Castagna, T. Feldt, G. Green, M.L. Green, F.-X. Lescure, E. Nicastrì, R. Oda, K. Yo, E. Quiros-Roldan, A. Studemeister, J. Redinski, S. Ahmed, J. Bernett, D. Chelliah, D. Chen, S. Chihara, S.H. Cohen, J. Cunningham, A. D'Arminio Monforte, S. Ismail, H. Kato, G. Lapadula, E. L'Her, T. Maeno, S. Majumder, M. Massari, M. Mora-Rillo, Y. Mutoh, D. Nguyen, E. Verweij, A. Zoufaly, A.O. Osinusi, A. DeZure, Y. Zhao, L. Zhong, A. Chokkalingam, E. Elboudwarej, L. Telep, L. Timbs, I. Henne, S. Sellers, H. Cao, S.K. Tan, L. Winterbourne, P. Desai, R. Mera, A. Gaggar, R.P. Myers, D.M. Brainard, R. Childs, and T. Flanigan, *Compassionate Use of Remdesivir for Patients with Severe Covid-19*. *The New England journal of medicine*, 2020.
  51. Dey, S.K., M.M. Rahman, U.R. Siddiqi, and A. Howlader, *Analyzing the epidemiological outbreak of COVID-19: A visual exploratory data analysis approach*. *Journal of Medical Virology*, 2020.
  52. Bansal, M., *Cardiovascular disease and COVID-19*. *Diabetes & metabolic syndrome*, 2020. **14**(3): p. 247-250.
  53. Wu, C., X. Chen, Y. Cai, J.a. Xia, X. Zhou, S. Xu, H. Huang, L. Zhang, X. Zhou, C. Du, Y. Zhang, J. Song, S. Wang, Y. Chao, Z. Yang, J. Xu, X. Zhou, D. Chen, W. Xiong, L. Xu, F. Zhou, J. Jiang, C. Bai, J. Zheng, and Y. Song, *Risk Factors Associated With Acute Respiratory Distress Syndrome and Death in Patients With Coronavirus Disease 2019 Pneumonia in Wuhan, China*. *JAMA internal medicine*, 2020.
  54. Wang, L., W. He, X. Yu, D. Hu, M. Bao, H. Liu, J. Zhou, and H. Jiang, *Coronavirus Disease 2019 in elderly patients: characteristics and prognostic factors based on 4-week follow-up*. *The Journal of infection*, 2020.
  55. Ruan, Q., K. Yang, W. Wang, L. Jiang, and J. Song, *Clinical predictors of mortality due to COVID-19 based on an analysis of data of 150 patients from Wuhan, China*. *Intensive Care*

- Medicine, 2020.
56. Du, R.-H., L.-R. Liang, C.-Q. Yang, W. Wang, T.-Z. Cao, M. Li, G.-Y. Guo, J. Du, C.-L. Zheng, Q. Zhu, M. Hu, X.-Y. Li, P. Peng, and H.-Z. Shi, *Predictors of Mortality for Patients with COVID-19 Pneumonia Caused by SARS-CoV-2: A Prospective Cohort Study*. The European respiratory journal, 2020.
  57. Chen, T., Z. Dai, P. Mo, X. Li, Z. Ma, S. Song, X. Chen, M. Luo, K. Liang, S. Gao, Y. Zhang, L. Deng, and Y. Xiong, *Clinical characteristics and outcomes of older patients with coronavirus disease 2019 (COVID-19) in Wuhan, China (2019): a single-centered, retrospective study*. The journals of gerontology. Series A, Biological sciences and medical sciences, 2020.
