# Supplementary material
Source: PubMed Central journal article supplement (PMC7398462)
Supplement: heartjnl-2020-317062supp002.pdf [file heartjnl-2020-317062supp002.pdf]

**Supplementary File 2.**

Figure 2. Funnel plots of the odds ratios for cardiovascular disease (A), hypertension (B), and cardiac injury (C) and risk of in-hospital mortality in COVID-19.

(A)

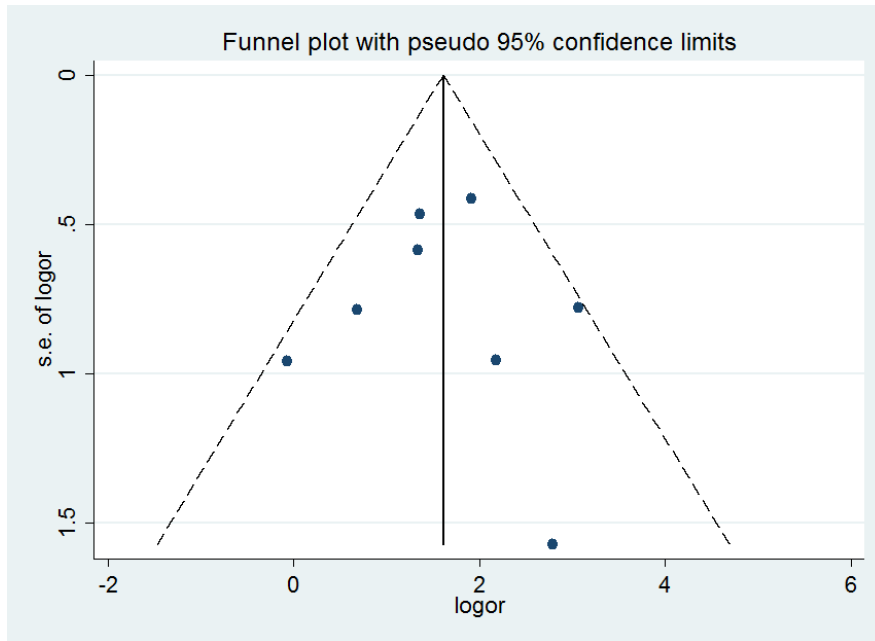

(B)

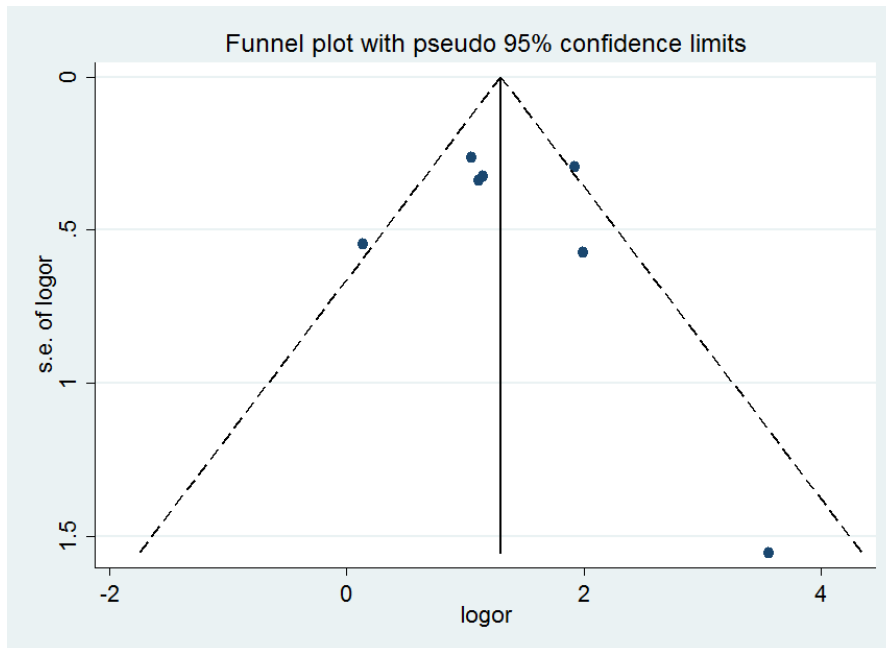

(C)

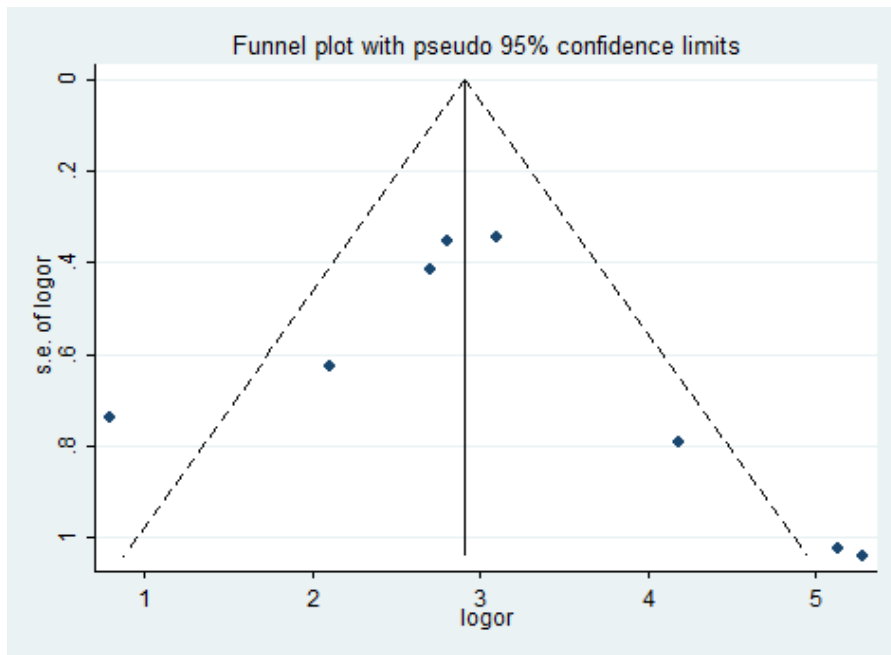

Table 2. Publication bias tested by Egger's test and Begg's test.

|                        | Egger's test | Begg's test |
|------------------------|--------------|-------------|
|                        | P value      | P value     |
| Cardiovascular disease | 0.990        | 0.771       |
| Hypertension           | 0.661        | 0.764       |
| Cardiac injury         | 0.386        | 0.443       |
