# Supplementary material
Source: PubMed Central journal article supplement (PMC7398462)
Supplement: heartjnl-2020-317062supp003.pdf [file heartjnl-2020-317062supp003.pdf]

**Supplementary File 3.**

Supplementary Table 3a. Influence of each study on association between underlying cardiovascular disease and in-hospital mortality.

| Study omitted | Summary OR | Lower limit of 95%<br>CI | Upper limit of 95% CI |
|---------------|------------|--------------------------|-----------------------|
| Chen T, 2020  | 5.42       | 3.24                     | 9.06                  |
| Deng Y, 2020  | 5.26       | 3.23                     | 8.56                  |
| Guan WJ, 2020 | 4.38       | 2.56                     | 7.50                  |
| He XW, 2020   | 5.45       | 3.41                     | 8.71                  |
| Yang XB, 2020 | 5.54       | 3.49                     | 8.79                  |
| Yuan ML, 2020 | 4.88       | 3.10                     | 7.68                  |
| Zhou F, 2020  | 4.36       | 2.73                     | 6.98                  |
| Cao LJ, 2020  | 4.83       | 3.04                     | 7.67                  |

Supplementary Table 3b. Influence of each study on association between preexisting hypertension and in-hospital mortality.

| Study omitted | Summary OR | Lower limit of 95%<br>CI | Upper limit of 95% CI |
|---------------|------------|--------------------------|-----------------------|
| Chen T, 2020  | 3.93       | 2.21                     | 7.00                  |
| Deng Y, 2020  | 3.82       | 2.16                     | 6.77                  |
| Guan WJ, 2020 | 3.10       | 2.01                     | 4.80                  |
| He XW, 2020   | 4.15       | 2.73                     | 6.31                  |
| Yang XB, 2020 | 3.50       | 2.24                     | 5.48                  |
| Zhou F, 2020  | 3.85       | 2.19                     | 6.76                  |
| Cao LJ, 2020  | 3.39       | 2.07                     | 5.53                  |

Supplementary Table 3c. Influence of each study on association between cardiac injury and in-hospital mortality.

| Study omitted | Summary OR | Lower limit of 95%<br>CI | Upper limit of 95% CI |
|---------------|------------|--------------------------|-----------------------|
| Chen T, 2020  | 23.08      | 9.32                     | 57.18                 |
| Deng Y, 2020  | 17.46      | 8.73                     | 34.91                 |
| Guo T, 2020   | 23.22      | 9.68                     | 55.74                 |
| He XW, 2020   | 24.35      | 11.05                    | 53.65                 |
| Shi SB, 2020  | 21.80      | 8.81                     | 53.96                 |
| Yang XB, 2020 | 25.80      | 13.67                    | 48.71                 |
| Zhou F, 2020  | 17.30      | 8.74                     | 34.24                 |
| Cao LJ, 2020  | 18.41      | 8.69                     | 39.01                 |
