# Supplementary material
Source: PubMed Central journal article supplement (PMC7398462)
Supplement: heartjnl-2020-317062supp004.pdf [file heartjnl-2020-317062supp004.pdf]

**Supplementary File 4.**

Supplementary Table 4. The significance of potential sources of heterogeneity tested by meta-regression.

| Test factor     | Cardiovascular disease | Hypertension | Cardiac injury |
|-----------------|------------------------|--------------|----------------|
|                 | P value                |              |                |
| Study design    | 0.561                  | 0.592        | 0.544          |
| Sample size     | 0.563                  | 0.116        | 0.421          |
| Mean age        | 0.165                  | 0.124        | 0.141          |
| Male proportion | 0.230                  | 0.072        | 0.577          |
