# Supplementary material
Source: PubMed Central journal article supplement (PMC7398462)
Supplement: heartjnl-2020-317062supp005.pdf [file heartjnl-2020-317062supp005.pdf]

## Supplementary File 5.

## Search strategy for PubMed

Search (((((((((((((cardiovascular disease[Title/Abstract]) OR hypertension[Title/Abstract]) OR coronary heart disease[Title/Abstract]) OR coronary artery disease[Title/Abstract]) OR heart failure[Title/Abstract]) OR cardiac injury[Title/Abstract]) OR myocardial injury[Title/Abstract]) OR troponin[Title/Abstract]) OR mortality[Title/Abstract]) OR fatality[Title/Abstract]) OR death[Title/Abstract])) OR "Cardiovascular Diseases"[Mesh])) AND (((((coronavirus[Title/Abstract]) OR COVID-19[Title/Abstract]) OR 2019-nCoV[Title/Abstract]) OR SARS-CoV-2[Title/Abstract])) OR "Coronavirus"[Mesh])
